# Supplementary material for: Integrative Transcriptome, Genome and Quantitative Trait Loci Resources Identify Single Nucleotide Polymorphisms in Candidate Genes for Growth Traits in Turbot
Source: Int J Mol Sci. 2016 Feb 17;17(2):243. doi: 10.3390/ijms17020243 (PMC4783974; doi:10.3390/ijms17020243)
Supplement: Supplementary file 1 [file ijms-17-00243-s001.xls]

## Sheet: Table S1
Table S1. RNAseq-derived growth-related genes in turbot turbot located near a growth-QTL or selected due to growth relevance. Underlined genes were selected for SNP genotyping.
Gene	Gene description	Expression	Turbot genome: gene position	LG	Closest QTL marker	cM	Turbot genome: marker position	Distance gene-marker	Comments
acss3	Acyl-CoA synthetase short-chain family member 3	Muscle & Liver	sm5_s00049: 1370365-1390523	16	SmaUSC-E11	16.451	469176	1378832	Close to a body weight QTL marker which explains 13% of the variance
acta1	Actin, alpha skeletal muscle	Muscle & Liver	sm5_s00264: 70959-76538	15	Sma-USC149	37.14	121677	50718	Close to a body weight suggestive QTL marker which explains 13% of the variance
actc	Actin, alpha cardiac muscle 1	Muscle	sm5_s00046: 2116178-2118967	3 (10)*	Sma-USC144	28.1	119931	1996247	Close to a marker in the confidence interval of a Fulton's condition factor QTL
akirin2	Akirin2	Muscle & Liver	sm5_s00026: 4028679-4032222	23	Sma-USC273	11.5	Not in the same genomic scaffold		Functional relevance, length QTL in the same LG
akt3	RAC-gamma serine/threonine-protein kinase	Muscle & Liver	sm5_s00031: 2271664-2274918	15	Sma-USC211	34.125	648400	2270045	Close to a body weight and length QTL marker which explains 13 and 7% of the variance respectively
atp2a1	Sarcoplasmic/endoplasmic reticulum calcium ATPase 1	Muscle	sm5_s00011: 7017713-7026618	21	Sma-USC234	21.2	2653292	4364421	Close to a marker in the confidence interval of suggestive fulton's condition factor QTL
bmp1	Bone morphogenetic factor 1 (metaloproteasa)	Muscle & Liver	sm5_s00038: 507-2963	12	3/9CA15	6.542	2307153	1063654	Close to a length QTL marker which explains a 10% of the variance
bmp2	Bone morphogenetic factor 2	Liver	Sm5_s00047: 3357065-3357588	23	Sma-USC273	11.516	5248404	1896338	Functional relevance, length QTL in the same LG
capn_gill	Calpain gill	Muscle	sm5_s00264: 36646-48047	15	Sma-USC149	37.14	121677	85031	Close to a body weight suggestive QTL marker which explains 13% of the variance
capn1a	Calpain 1a	Muscle & Liver	sm5_s00049: 215539-232405	16	SmaUSC-E11	16.451	469176	215539	Close to a body weight QTL marker which explains 13% of the variance
chpt1	Choline phosphotransferase 1	Muscle & Liver	sm5_s00183: 344852-351512	16	Sma-USC50	57.2	Not in the same genomic scaffold		Close to a marker in the confidence interval of a body weight QTL which explain 13% of the variance
eno1	Alpha-enolase	Muscle & Liver	sm5_s00004: 2019093-2027255	10	SmaUSC-E32	32.3	7670260	5651167	Close to a marker in the confidence interval of a Fulton's condition factor QTL
ets1	V-ets erythroblastosis virus E26 oncogene homolog 1	Muscle & Liver	sm5_s00031: 2865255-2876287	15	Sma-USC211	34.125	648400	2865255	Close to a body weight and length QTL marker
far1	Fatty acyl CoA reductase 1	Muscle	sm5_s00049: 688080-708060	16	SmaUSC-E11	16.451	469176	248904	Close to a body weight QTL marker which explains 13% of the variance
far2	Fatty acyl CoA reductase 2	Muscle & Liver	sm5_s00100: 786707-808933	6	Sma-USC264	78.767	1610372	823665	Close to a body weight and length QTL marker
fbxo32	F-box protein 32 - Atrogin 1	Muscle & Liver	sm5_s00006: 2111288-2118792	2	Sma-USC242	18.492	4043510	1932222	Close to a marker in the confidence interval of a Fulton's condition factor QTL
fgf6b	Fibrobalst growth factor 6b	Muscle	sm5_s00049: 504575-504862	16	SmaUSC-E11	16.451	469176	34946	Close to a Fulton's condition factor QTL marker which explains 25% of the variance
foxm1	Forkhead box M1	Muscle	sm5_s00049: 1231961-1244151	16	SmaUSC-E11	16.451	469176	1233371	Close to a body weight QTL marker which explains 13% of the variance
foxo1b	Forkhead Box O1b	Muscle & Liver	sm5_s00014: 4370517-4374201	8	Sma-USC194	3.7	2527472	1843045	Close to a marker in the confidence interval of a suggestive length QTL
fstb	Follistatin b	Muscle	sm5_s00018: 3735326-3739128	12	SmaUSC-E14	24.733	2338470	1396856	Close to a gength QTL marker which explains 13% of the variance
ghr1	Growth hormone receptor 1	Muscle & Liver	sm5_s00018: 1514465-1516828	12	SmaUSC-E14	24.733	2338470	824005	Close to a gength QTL marker which explains 13% of the variance
ghr2	Growth hormone receptor 2	Muscle & Liver	sm5_s00067: 8315-8683	14	Sma-USC220	8.5	Not in the same genomic scaffold		Close to a body weight and length QTL marker which explains 16 and 18% of the variance respectively
got1a	Glutamic-oxaloacetic transaminase 1a	Muscle & Liver	sm5_s00035: 2517015-2521081	2	Sma-USC112	81.295	3143295	626280	Close to a marker in the confidence interval of a suggestive body weight and length QTL
gpi2	Glucosamine-6-phosphate isomerase 2	Muscle	sm5_s00032: 4424331-4430699	4	Sma-USC7	57.415	5311578	887247	Close to a Fulton's condition factor QTL marker which explains 10% of the variance
igf1	Insulin-like growth factor 1	Liver	sm5_s00049: 1921217-1921496	16	SmaUSC-E11	16.451	469176	1921157	Close to a Fulton's condition factor QTL marker which explains 25% of the variance
igf1r	insulin like growth factor 1 receptor	Muscle & Liver	sm5_s00049: 1921217-1921496	4	Sma-USC7	57.415	5311578	3390361	Close to a Fulton's condition factor QTL marker which explains 10% of the variance
igf2b	Insulin-like growth factor 2b	Muscle & Liver	sm5_s00015: 9072901-9076211	6	Sma-USC264	78.8	Not in the same genomic scaffold		Functional relevance, body weight and length QTL nearby
igfbp2	Insulin like growth factor binding protein 2	Liver	sm5_s00002: 14058165-14077146	20	Sma-USC29	5.1	6782307	7275858	Close to a suggestive length QTL marker which explains 8% of the variance
igfbp3	Insulin like growth factor binding protein 3	Muscle	sm5_s00081: 1424327-1426734	1	Sma-USC15	44.611	12538351	419937	Close to a body weight QTL marker which explains 14% of the variance
igfbp4	Insulin like growth factor binding protein 4	Muscle	sm5_s00003: 13415276-13427210	17	Sma-USC91	7.083	11526123	1889153	Close to a length QTL marker which explains 6% of the variance
igsf11	Immunoglobulin superfamily, member 11	Muscle	sm5_s00031: 1871094-1875811	15	Sma-USC211	34.125	648400	1871094	Close to a body weight and length QTL marker which explains 13 and 7% of the variance respectively
insrb	Insulin Receptor	Muscle & Liver	sm5_s00005: 4625938-4671439	5	Sma-USC247	36.6	6947748	2321810	Close to a marker in the confidence interval of a body weight and length QTL
jak1	Janus kinase 1	Muscle & Liver	sm5_s00005: 10621978-10651537	5	Sma-USC65	19.3	11011964	389986	Close to a marker in the confidence interval of a body weight and length QTL
jak2a	Janus kinase 2a	Muscle & Liver	sm5_s00038: 2889154-2910225	14	Sma-USC82	25.231	3041565	152411	Close to a body weight QTL marker which explains 11% of the variance
jak2b	Janus kinase 2b	Muscle & Liver	sm5_s00018: 4359225-4375937	12	SmaUSC-E14	24.733	2338470	2020755	Close to a gength QTL marker which explains 13% of the variance
lepr	Leptin receptor	Muscle & Liver	sm5_s00005: 10523713-10525449	5	Sma-USC65	19.3	11011964	488251	Close to a marker in the confidence interval of a body weight and length QTL
lum	Lumican	Muscle & Liver	sm5_s00036: 3958499-3962579	16	Sma-USC223	55.723	3453297	504610	Close to a body weight QTL marker which explains 13% of the variance
mef2a	Myocite enhancer factor a	Muscle & Liver	sm5_s00015: 4752835-4753493	6	Sma-USC147	19.8	Not in the same genomic scaffold		Functional relevance, suggestive body weight and length QTL nearby
miR133b	Mir133b	Muscle	sm5_s00047: 181457-181540	23	Sma-USC273	11.516	5248404	5066947	Close to a body weight and length QTL marker which explains 8 and 11% of the variance
mstn1	Myostatin 1	Muscle	sm5_s00275: 54513-50872	20	Sma-USC29	5.1	Not in the same genomic scaffold		Close to a suggestive length QTL marker which explains 8% of the variance
mtor	Serine/threonine-protein kinase mTOR	Muscle & Liver	sm5_s00021: 2846237-2839385	10	Sma-USC79	61.4	Not in the same genomic scaffold		Close to a marker in the confidence interval of a Fulton's condition factor QTL
mtpn	Myotrophin	Muscle & Liver	sm5_s00049: 1009715-1022594	16	SmaUSC-E11	16.451	469176	1011071	Close to a body weight QTL marker which explains 13% of the variance
Myc	Myosin Heavy Chain	Muscle	sm5_s00062: 1925743-1983029	11	Sma-USC201	18.82	598959	1326784	Close to a body weight and Fulton's condition factor QTL marker which explains 10 and 6% of the variance
myf5	Myogenic factor 5	Muscle	sm5_s00084: 1867242-1867533	1	Sma-USC101	73.804	1512758	353498	Close to a body weight QTL marker which explains 8% of the variance
myf5	myogenic factor 5	Muscle	sm5_s00049: 1432659-1432967	16	SmaUSC-E11	16.451	469176	963483	Close to a body weight QTL marker which explains 13% of the variance
myo9b	Myosin IXB	Muscle & Liver	sm5_s00005: 4560682-4577163	5	Sma-USC247	36.6	6947748	2387066	Close to a marker in the confidence interval of a body weight and length QTL
myoD	Myoblast determination protein	Muscle	sm5_s00084: 1864405-1864811	1	Sma-USC101	73.804	1512758	351647	Close to a body weight QTL marker which explains 8% of the variance
myoG	Myogenin	Muscle	sm5_s00009: 6477112-6477960	11	Sma-USC158	40.608	3265785	3209667	Close to a Fulton's condition factor QTL marker which explains 10% of the variance
napepld	N-acyl phosphatidylethanolamine phospholipase D	Muscle	sm5_s00036: 1812228-1812393	16	Sma-USC223	55.723	3453297	1641069	Close to a body weight QTL marker which explains 13% of the variance
p4htm	Prolyl 4-hydroxylase, transmembrane (endoplasmic reticulum) - Enlace 1 alpha 2	Muscle	sm5_s00062: 1918904-1919030	11	Sma-USC201	18.82	598959	1917880	Close to a body weight and Fulton's condition factor QTL marker which explains 10 and 6% of the variance
pah	Phenylalanine hydroxylase	Muscle & Liver	sm5_s00049: 1981690-1994055	16	SmaUSC-E11	16.451	469176	1512514	Close to a body weight QTL marker which explains 13% of the variance
pcna	Proliferating cell nuclear antigen	Muscle & Liver	sm5_s00018: 3111923-3116141	12	SmaUSC-E14	24.733	2338470	773453	Close to a gength QTL marker which explains 13% of the variance
pklr	Pyruvate kinase, liver and RBC	Muscle & Liver	sm5_s00006: 7966856-7978169	2	Sma-USC168	30.604	7523127	443729	Close to a marker for a suggestive contidion factor QTL
pkm	Pyruvate kinase a, muscle	Muscle & Liver	sm5_s00032: 2685133-2700998	4	Sma-USC7	57.415	5311578	2685133	Close to a Fulton's condition factor QTL marker which explains 10% of the variance
plod2	Procollagen-lysine 2-oxoglutarate 5-dioxygenase 2	Muscle & Liver	sm5_s00003: 12495353-12512039	17	Sma-USC91	7.083	11526123	968010	Close to a length QTL marker which explains 6% of the variance
prlr2	Prolactin receptor 2	Muscle & Liver	sm5_s00018: 4285275-4288600	12	SmaUSC-E14	24.733	2338470	1946805	Close to a gength QTL marker which explains 13% of the variance
ptn	Pleiotrpophin.	Liver	sm5_s00049: 1162938-1170323	16	SmaUSC-E11	16.451	469176	693697	Close to a body weight QTL marker which explains 13% of the variance
pvalb1	Parvalbumin 1	Muscle	sm5_s00011: 4564555-4564976	21	Sma-USC234	21.2	2653292	1911263	Close to a marker in the confidence interval of suggestive fulton's condition factor QTL
smad4b	Mothers against decapentaplegic homolog 4	Muscle & Liver	sm5_s00038: 1262115-1269966	14	Sma-USC63	32.244	672787	589328	Close to a body weight QTL marker which explains 11% of the variance
sox5	SRY (sex determining region Y)-box 5	Muscle & Liver	sm5_s00040: 1208443-1291913	16	Sma-USC256	34.787	647916	560527	Close to a suggestive body weight and length QTL marker which explains 7 and 8% of the variance respectively
ssr3	Translocon-associated protein subunit gamma	Muscle & Liver	sm5_s00055: 538625-540262	15	Sma-USC32	42.246	Not in the same genomic scaffold		Close to body weight and length QTL markers
stat5.1	Signal transducer and activator of transcription 5	Muscle & Liver	sm5_s00085: 413590-430305	21	Sma-USC41	3.5	288265	125325	Close to a suggestive Fulton's condition factor marker which explains 4% of the variance
tagln	Transgelin	Muscle & Liver	sm5_s00031: 1150381-1156259	15	Sma-USC211	34.125	648400	501981	Close to a body weight and length QTL marker which explains 13 and 7% of the variance respectively
tgfb1	Transforming growth factor ß1	Muscle & Liver	sm5_s00028: 3429587-3432514	15	Sma-USC149	54	Not in the same genomic scaffold		Close to a body weight suggestive QTL marker which explains 13% of the variance
tgfb2	Transforming growth factor ß2	Muscle & Liver	sm5_s00058: 12580-13005	2	Sma-USC112	81.3	Not in the same genomic scaffold		Close to a market in the confidence interval of a suggestive body weight and length QTL
tgfbr1	Transforming growth factor ß1 receptor	Muscle & Liver	sm5_s00003: 2945434-2953081	17	Sma-USC55	26.6	4514498	1569064	Close to a length QTL marker which explains a 9% of the variance
tgfbr2	Transforming growth factor ß2 receptor	Muscle & Liver	sm5_s00010: 2173667-2180394	22	nd	nd	nd	nd	Functional relevance for growth traits in fish and vertebrate
tgfbr3	Transforming growth factor ß3 receptor	Muscle & Liver	sm5_s00034: 1717691-1729519	5	ScmM1	76.417	1452496	265186	Close to a body weight and length QTL marker which explains 11% of the variance
tnnc2	Troponin C, skeletal muscle	Muscle	sm5_s00174: 4685-20354	10	SmaUSC-E32	32.3	Not in the same genomic scaffold		Functional relevance, Fulton's condition factor QTL nearby
usp18	Ubiquitin specific peptidase	Muscle & Liver	sm5_s00049: 553960-557882	16	SmaUSC-E11	16.451	469176	114784	Close to a body weight QTL marker which explains 13% of the variance
vwa5a	Von Willebrand factor A domain containing 5A	Muscle & Liver	sm5_s00031: 2221015-2231777	15	Sma-USC211	34.125	648400	2221015	Close to a body weight and length QTL marker which explains 13 and 7% of the variance respectively
	* This gene was predicted to map to LG3 using the genome, however genotyping mapped it to LG10
Gene	Gene description
acss3	Acyl-CoA synthetase short-chain family member 3
actc	Actin, alpha cardiac muscle 1
akirin2	Akirin2
akt3	RAC-gamma serine/threonine-protein kinase
atp2a1	Sarcoplasmic/endoplasmic reticulum calcium ATPase 1
chpt1	Choline phosphotransferase 1
eno1	Alpha-enolase
far2	Fatty acyl CoA reductase 2
fbxo32	F-box protein 32 - Atrogin 1
fgf6b	Fibrobalst growth factor 6b
foxm1	Forkhead box M1
foxo1b	Forkhead Box O1b
ghr2	Growth hormone receptor 2
got1a	Glutamic-oxaloacetic transaminase 1a
igf1	Insulin-like growth factor 1
igf2b	Insulin-like growth factor 2b
igfbp2	Insulin like growth factor binding protein 2
igfbp3	Insulin like growth factor binding protein 3
insrb	Insulin Receptor
jak2a	Janus kinase 2a
jak2b	Janus kinase 2b
lepr	Leptin receptor
lum	Lumican
mef2a	Myocite enhancer factor a
miR133b	Mir133b
mstn1	Myostatin 1
mtor	Serine/threonine-protein kinase mTOR
myoD	Myoblast determination protein
myoG	Myogenin
pah	Phenylalanine hydroxylase
pklr	Pyruvate kinase, liver and RBC
pkm	Pyruvate kinase a, muscle
ptn	Pleiotrpophin.
pvalb1	Parvalbumin 1
smad4b	Mothers against decapentaplegic homolog 4
sox5	SRY (sex determining region Y)-box 5
ssr3	Translocon-associated protein subunit gamma
stat5.1	Signal transducer and activator of transcription 5
tgfb1	Transforming growth factor ß1
tgfb2	Transforming growth factor ß2
tgfbr1	Transforming growth factor ß1 receptor
tgfbr2	Transforming growth factor ß2 receptor
tgfbr3	Transforming growth factor ß3 receptor
tnnc2	Troponin C, skeletal muscle
usp18	Ubiquitin specific peptidase

## Sheet: Table S2
Table S2. Functional annotation information aobut the selected 45 growth-related genes, based on GO terms classifications and association analysis in fish and vertebrates.
Gene SNP marker	Genic functional annotation	Biological Process (GO terms) and association to growth traits
acss3	Acyl-CoA synthetase short-chain family member 3	energy storage and metabolic process	Signaling and fatty acids incorporation into membranes
actc1	Actin, Alpha, Cardiac Muscle 1	negative regulation of apoptotic process	skeletal muscle thin filament assembly
akirin2	Akirin-2	innate immune response	positive regulation of interleukin-6 production
akt3	Serine/threonine protein kinase family.	signal transduction	regulators of cell signaling in response to insulin and growth factors.
atp2a1	ATPase, Ca++ transporting, cardiac muscle, fast twitch 1	regulation of skeletal muscle fiber contraction	intrinsic apoptotic signaling pathway in response to endoplasmic reticulum stress
chpt1	Cholinephosphotransferase 1	phospholipid biosynthetic process	platelet activating factor biosynthetic process
eno1	Alpha-enolase	carbohydrate metabolic process	gluconeogenesis
far2	Fatty acyl CoA reductase 2	long-chain fatty-acyl-CoA metabolic process	wax biosynthetic process
fbxo32	F-box only protein 32	response to electrical stimulus involved in regulation of muscle adaptation	protein ubiquitination
fgf6b	Fibroblast growth factor 6b	fibroblast growth factor receptor signaling pathway	myoblast differentiation
foxm1	Forkhead box M1	positive regulation of cell proliferation	G2/M transition of mitotic cell cycle
foxo1b	forkhead box O1 b	gluconeogenesis, cell differentiation	anatomical structure morphogenesis
ghr2	Growth hormone receptor type 2	response to growth hormone	cytokine-mediated signaling pathway
got1a	glutamic-oxaloacetic transaminase 2, soluble	lipid metabolic process	vesicle-mediated transport
ifg1	insulin-like growth factor 1	insulin-like growth factor receptor signaling pathway	muscle hypertrophy
igf2b	insulin-like growth factor 2	insuline-like growth factor activity, somitogenesis	fin regeneration
igfbp2	insulin like growth factor binding protein 2	regulation of IGF receptor signaling pathway	regulation of cell growth
igfbp3	insulin like growth factor binding protein 3	positive regulation of IGF receptor signaling pathway	regulation of cell growth
insr	insulin receptor	insulin receptor signaling pathway	glucose homeostasis
jak2a	Janus kinase 2 a	activation of JAK-STAT cascade	regulation of cell proliferation
jak2b	Janus kinase 2 b	cytokine-mediated signaling pathway	regulation of cell proliferation
lepr	leptin receptor	cytokine-mediated signaling pathway	negative regulation of gluconeogenesis
lum	Lumican	collagen fibril organization	cartilage development
mef2a	myocite enhancer factor a	cell differentiation	myofibril assembly
mir133b	microRNA 133b	gene silencing by miRNA	response to oxygen levels, regulation of myogenic differentiation
mstn1	myostatin 1 (Growth/differentiation factor 8)	transforming growth factor beta receptor signaling pathway	negative regulation of skeletal muscle satellite cell proliferation
mtor	mechanistic target of rapamycin (serine/threonine kinase)	germ cell development	positive regulation of myotube differentiation
myod	myoblast determination protein	transcription factor binding	positive regulation of myoblast differentiation
myog	myogenin	cellular response to growth factor stimulus	positive regulation of myoblast differentiation
pah	phenylalanine hydroxylase	oxidation-reduction process	aromatic amino acid family metabolism
pklr	pyruvate kinase, liver and RBC	glycolytic process	response to nutrient
pkm	pyruvate kinase, muscle	glycolytic process
ptn	Pleiotrpophin.	positive regulation of cell division	ossification
pvalb1	parvalbumin 1	muscle relaxation	association to growth traits in fish
smad4	mothers against decapentaplegic homolog 4	transforming growth factor beta receptor signaling pathway	cell proliferation
sox5	SRY (sex determining region Y)-box 5	cellular response to transforming growth factor beta stimulus	cartilage development
ssr3	Signal Sequence Receptor, Gamma	primary metabolic process	protein membrane targeting
stat5	signal transducer and activator of transcription 5	cytokine-mediated signaling pathway	positive regulation of multicellular organism growth
tgfb1	transforming growth factor 1	negative regulation of mitotic cell cycle
tgfb2	transforming growth factor 2	extrinsic apoptotic signaling pathway	regulation of cell proliferation
tgfgr1	TGF-beta receptor type-1	signal transduction by protein phosphorylation	regulation of growth
tgfbr2	TGF-beta receptor type-2	signal transduction by protein phosphorylation	regulation of growth
tgfbr3	TGF-beta receptor type-3	signal transduction by protein phosphorylation	regulation of growth
tnnc2	troponin C type 2	skeletal muscle contraction
usp18	Ubiquitin specific peptidase 18	regulation of ubiquitin–proteasome-mediated muscle protein degradation	regulation by growth factors (igf1) and nutrients (amino acids)

## Sheet: Table S3
Table S3. Sequenom assays designed for the selected 45 SNPs. Genic SNP name, length of the sequence, external PCR primer sequences (PCRP), tailed extension primer (tails in lower case), direction of the 2nd and tailed primers (F = forward, R = Reverse), and number of multiplex reaction (M). Unfeasible SNPs are indicated in bold and red colour.
Genic SNP_ID	Length	2nd-PCRP (Direction)	1st-PCRP		Tailed extension primer (Direction)	Direction	Multiplex
Acss3	115	ACGTTGGATGAGAATCGGTCGGGCTGGTC	ACGTTGGATGCTGCAGGGGCCACGCGTC		gagaCGCGGCGAAGGCTCGG	F	M1
Actc-	100	ACGTTGGATGTCATTACCTGACCCAACTCC	ACGTTGGATGAGAGTTCAAGGCTGCCTTCG		tgaaGATGTCACCGCCACC	R	M1
Akirin2	94	ACGTTGGATGCAATCATCAGCTTCCACACG	ACGTTGGATGAAATCGGCGAGTGTATCTTG		TTAAGCCGCCGCATT	F	M1
Akt3	117	ACGTTGGATGAAGCGCACTCGTCTCTTTAG	ACGTTGGATGGGTTGGAGGTGTTCGTTTTC		cccttCCTCTTTCCTTCTGTTAGT	F	M1
Atp2a1	107	ACGTTGGATGTTTCCTCACCGTCTCTTCTC	ACGTTGGATGTAATGGTGGTGGGTTGACTG		GTCTCTTCTCTCCATCC	R	M1
Chpt1	105	ACGTTGGATGTCAAGAAGTCTTCCAGCCTC	ACGTTGGATGTTGGAGATCTTGGCGATGAC		CCCCTGTCTGTACCT	R	M1
Eno1	111	ACGTTGGATGATGTTGCAAACCCCGACTTC	ACGTTGGATGCCATCCCATCATATCCTCTC		gattTCCATGTGTCTGACAACC	R	M1
Far2	119	ACGTTGGATGCTGGGCAGAGTACATGGAAA	ACGTTGGATGTTGTTGAGGTGTTTCCGTGC		GTATGGGAACGAAGAAGTA	R	M1
Fbxo32	103	ACGTTGGATGAGCGCATATAAGACGCGCTG	ACGTTGGATGTGTGTCTCTTCCTGTAGGGC		ccacAAGACGCGCTGCGCAAC	F	M2
Fgf6b	101	ACGTTGGATGCTGTTCATTGCGACAAACCG	ACGTTGGATGTCTGATCGAAGTCTCCACCG		aGCGACAAACCGCTCGCCC	R	M2
Foxm1	114	ACGTTGGATGTGTGAAGCGCTTTGTTTCCC	ACGTTGGATGGTCTCACATCATCATTCGAC		TTGTTTCCCATAGATGTGAAAT	R	M2
Foxo1b	106	ACGTTGGATGGGGCAGATATACTGGTTCTC	ACGTTGGATGATGAATTCTCTCTCCCCTGC		actgtTTCTCATACGCCCCAAAG	R	M2
Ghr2	140	ACGTTGGATGAGCAGTTGGAGGACAGGGAG	ACGTTGGATGAGCTGTACAACAGCGACCC		ctgaTCCTCCATGTCCAGGTC	F	M2
Got1a	124	ACGTTGGATGGTCTCTTTGTATCTTTGGGC	ACGTTGGATGGTGAGGACTGATGGATGATG		tGCAACTTATATAATCATCTGAATTTTA	F	M1
igf1	119	ACGTTGGATGTTAATTTCCCCATTTCCCCC	ACGTTGGATGCACATAATGTGGAAACCAGG		TGTGCTGGATGATAGAATAA	F	M2
Igf2b	108	ACGTTGGATGTGTAGAGTTTCGGGTTCAGC	ACGTTGGATGTGGTCGCTGACATCATAACG		cccGCCAACATGGGACTTG	R	M2
Igfbp2	128	ACGTTGGATGGCATGGATTTCAAAGCACTG	ACGTTGGATGTTAGGTGCGCTTCTCTTTGG		GGGAAACAAAAAACGCC	F	M2
Igfbp3	105	ACGTTGGATGAGAGAATCGATCTCAGAGGC	ACGTTGGATGAAAGAGCTCTCTCGTCGATG		AGGCCCGATTCTGATTATAGGAC	F	M1
Insr	102	ACGTTGGATGATGCTCTCCATGTTGTCCAG	ACGTTGGATGAGGTCTCCTTCTTCTACAGC		GGTCCAGGTCAAACTCCTC	R	M1
Jak2a	102	ACGTTGGATGTACTTTAAAACGTGACTGG	ACGTTGGATGGCGTACTGAACATTGGGAAC		caacACGTGACTGGAGGGGGT	F	M1
Jak2b	107	ACGTTGGATGTGGCTTCAACTCTGACAAGG	ACGTTGGATGTTGTTGACTGACTTCGGCTC		cccccCCGCTGTAGTTCGCCGATCGC	F	M1
Lepr	114	ACGTTGGATGATGGAGGAGAGGGACAGAG	ACGTTGGATGGTTGGATGGTGCAGCTTTTC		cGGCAGATGGGGCCCG	R	M2
Lum	116	ACGTTGGATGCCTTCCTGGAGTTATTCAAG	ACGTTGGATGTTTTGGATGATGCTCCCCAG		ggagTGGAGTTATTCAAGTTGTCATAT	R	M1
Mef2a	105	ACGTTGGATGTAAAGAGCCCTGATCAAGCC	ACGTTGGATGCCTTGCTTCCTTTCATCTCC		AGCCTCCAGTCACCA	R	M2
Mir133b	100	ACGTTGGATGCTTCCTGAAGCTTTCCTGTG	ACGTTGGATGCACAACAAACTCTGGCGAAG		aaTCCCCCTCACCTGACAGAG	R	M1
Mstn1	106	ACGTTGGATGGGGAAATAAGACACGTCATC	ACGTTGGATGGCCCAATAGCATTGGTAATC		cTTTCTGGATTGGATTGAAC	F	M2
Mtor	84	ACGTTGGATGATCGACCTCGGAGAGACCAC	ACGTTGGATGAGGAGTGAATGGATTCAGGC		ACCACTCTCAAGAAGCC	R	M2
myod	119	ACGTTGGATGCGATGTAGCTTATGGCGTTG	ACGTTGGATGTCAACGACGCCTTCGAGAC		cctaGTTGCGCAGGATCTCCACCTT	F	M1
Myog	99	ACGTTGGATGTTATTCCCTGCCTTGTCCTG	ACGTTGGATGTGTATTCATGCAGCAAGTGG		GCCTGTCAGATCTGACT	F	M1
Pah	98	ACGTTGGATGCCGCTTCCTCCTCGTTCAT	ACGTTGGATGACATTCAGATTGAGCAGCCG		CTCCTCGTTCATCTCGGT	R	M1
Pklr	99	ACGTTGGATGCGACACTGCTCATTAAAGCC	ACGTTGGATGAAGGCTTTTCATTTCTGTCC		cacgGCTCATTAAAGCCAAAAGAATTGC	R	M1
Pkm	121	ACGTTGGATGCTTGGGAATAACATCGCCAC	ACGTTGGATGTCTTGGCGAAGTACCAAAGG		TGACTTTTTTGTTTTTTTTTACAAGT	R	M1
Ptn	99	ACGTTGGATGTCTTTTTTTTCCCCCCTCCC	ACGTTGGATGTCCCCAGGAACAAATTGGAC		cccctCCCTCCCAAATTAGAGT	F	M1
pvalb1	97	ACGTTGGATGGTAATACCTACACCTGTCGG	ACGTTGGATGTCATTCTTCAGTTTGCGATG		gttaCATGCCTCGTGCTGGCTGTG	F	M1
Smad4	135	ACGTTGGATGCCTCAGTGTTATGAAACTGC	ACGTTGGATGCTGAGCGCTCTGCAACAATT		TGCAACTGAATTAAAGAATACC	R	M1
Sox5	99	ACGTTGGATGATGAAGGAGCAGCTGAAGAG	ACGTTGGATGCGTTGTTGAGGCTGAGGTTG		tgacGAGAGAGCAGCAGGTCCT	F	M2
Ssr3	126	ACGTTGGATGAGCAACCAGGTTTACTTATG	ACGTTGGATGACTGCGCATTACTTTTTGGC		ggggCAGGTTTACTTATGCTCTAC	R	M1
Stats5	95	ACGTTGGATGTTCCGGAATACTCCTTTAAC	ACGTTGGATGTGCCAGTCCACAGTTAGTAG		tgACTTTGTACGTGCTTGGT	F	M1
Tgbr1	128	ACGTTGGATGCACATGAAGTCTCAACTGGC	ACGTTGGATGTTCAGTTTTGACGAGGTCCG		CTCAACTGGCAACTGG	F	M1
Tgfb1	101	ACGTTGGATGCTCCATACACAGAAAAGTCC	ACGTTGGATGTTTTCAGCTGACACGGCTTC		ACAGAAAAGTCCTGGATG	R	M2
Tgfb2	105	ACGTTGGATGTGTCATTGTTCTTATGTGGC	ACGTTGGATGGCTTTCCTTTTTCATATGTG		agagTTGTTCTTATGTGGCCAAACAAAC	R	M1
Tgfbr2	94	ACGTTGGATGGAAAAGGGAATTCTGATGTCG	ACGTTGGATGTGCTTTTACACTTCTATAC		TTTCAGAAGAAAAAAAACATGAAAAC	F	M1
Tgfbr3	105	ACGTTGGATGGCTGACAGAGGTCAGTTCAC	ACGTTGGATGAAAGAGGAGAGCTCTTGCTG		ACAATAACATATTCACTCCTTCAC	F	M1
Tnnc2	100	ACGTTGGATGTCATTACCTGACCCAACTCC	ACGTTGGATGAGAGTTCAAGGCTGCCTTCG		ccGATGTCACCGCCACC	R	M2
Usp18	100	ACGTTGGATGTCCCCCTGTGACGAACATAG	ACGTTGGATGGTACACTTTGTATGCAGTGG		ccccCACATGGCACTGCCC	F	M2

## Sheet: Table S4
Table S4. Significant linkage disequilibrium tests in the studied turbot population at 5% level. Significant tests after Bonferroni correction were marked in bold.
	LG1
LG1		LG2
LG2			LG4
LG4				LG5
LG5					LG6
LG6		Mef2a-Pklr Igf2b-Tgfb2				LG8
LG8							LG10
LG10		Eno1-Pklr	Pkm-Tnnc2 Actc-Pkm	Lepr-Mtor	Eno1-Mef2a	Foxo1b-Mtor	Actc-Tnnc2 Eno1-Tnnc2 Actc-Eno1	LG11
LG11									LG14
LG14	Jak2b-Myog			Lepr-Smad4	Igf2b-Jak2b					LG15
LG15		Tgfb1-Tgfb2								Akt3-Tgfb1	LG16
LG16		Foxm1-Tgfb2			Igf2b-Pah		Eno1-Usp18 Chpt1-Mtor		Foxm1-Smad4	Akt3-Pah	igf1-Lum Chpt1-Usp18	LG20
LG20							Eno1- Igfbp2 Igfbp2 - Mtor				Mstn1-Ptn	Igfbp2-Mstn1
LG21				Atp2a1 - Lepr			Atp2a1 - Eno1 Atp2a1 - Mtor	Myog-pvalb1
LG22				Tgfbr2 - Tgfbr3	Igf2b-Tgfbr2							Mef2a-Tgfbr2
LG23				Mir133 - Tgfbr3	Akirin - Igf2b
